# Supplementary material for: Vacuolar Proton-Translocating ATPase May Take Part in the Drug Resistance Phenotype of Glioma Stem Cells
Source: MDPI journal article supplement (doi:10.3390/ijms25052743), 2024-02-27
Supplement: s1 [file s1]

## Supplementary

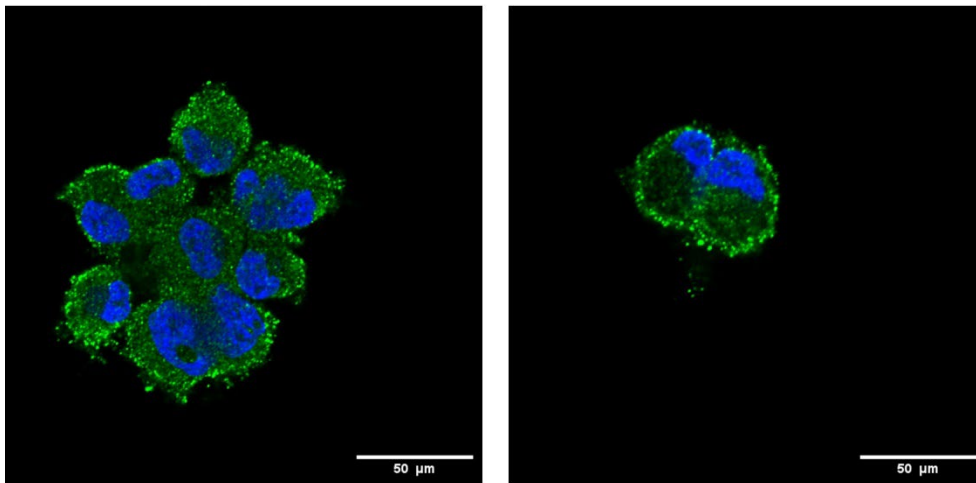

**Figure S1.** Assessment of V-ATPase localization. The picture shows the immunofluorescence performed on glioma-stem cell (GSC) line 7 as example. V-ATPase can be appreciated in green while nuclei are in blue (DAPI). Images were captured at 40X magnification. Unit of measurement bar = 50 µm.
